# Supplementary material for: Effectiveness of Early Psychosis Intervention: Comparison of Service Users and Nonusers in Population-Based Health Administrative Data
Source: Atypon-hosted journal article supplement (doi:10.1176/appi.ajp.2017.17050480), 2018-03-02
Supplement: appi.ajp.2017.17050480.ds001.pdf [file appi.ajp.2017.17050480.ds001.pdf]

 


Psychiatry Online
