# Supplementary material for: Effectiveness of Early Psychosis Intervention: Comparison of Service Users and Nonusers in Population-Based Health Administrative Data
Source: Atypon-hosted journal article supplement (doi:10.1176/appi.ajp.2017.17050480), 2018-03-02
Supplement: appi.ajp.2017.17050480.ds001.pdf [file appi.ajp.2017.17050480.ds001.pdf]

**Supplementary Table 1** – Details of variable creation for all variables used in the analysis.

| Variable Name                                     | Source of Data                | Description                                                                                                                    | Included in Propensity Score Model | Variable Name in Database | Values and Database Codes                                                                                                                                                                                                                                                           |
|---------------------------------------------------|-------------------------------|--------------------------------------------------------------------------------------------------------------------------------|------------------------------------|---------------------------|-------------------------------------------------------------------------------------------------------------------------------------------------------------------------------------------------------------------------------------------------------------------------------------|
| <b>Main Comparison Groups</b>                     |                               |                                                                                                                                |                                    |                           |                                                                                                                                                                                                                                                                                     |
| EPI-User                                          | Primary data from EPI program | User of PEPP services, defined based on linked database from program which included data on program clients and psychiatrists. | Yes (dependent variable)           | N/A                       | All people in the cohort who are also represented in the PEPP data are classified as an EPI-user (1), those who were not in the EPI data but had been seen by an EPI psychiatrist are classified as screened (2), and all remaining cohort members are classified as a non-user (0) |
| <b>Baseline Socio-Demographic Characteristics</b> |                               |                                                                                                                                |                                    |                           |                                                                                                                                                                                                                                                                                     |
| Age at Index Date                                 | RPDB                          | Age at index date                                                                                                              | Yes                                | BDATE                     | Continuous variable calculated based on index date and birth date                                                                                                                                                                                                                   |
| Gender                                            | RPDB                          | Recorded sex                                                                                                                   | Yes                                | SEX                       | 1 = Male<br>2 = Female                                                                                                                                                                                                                                                              |
| Rural Residence                                   | RPDB                          | Rural place of residence, defined using the Rurality Index of Ontario. Areas with score of 40 or above are considered rural.   | Yes                                | RIO2008                   | 1 = Rural<br>0 = Non-Rural                                                                                                                                                                                                                                                          |
| Resides Outside of Catchment Area                 | RPDB                          | Whether the patient resides outside of the EPI catchment area, based on list of postal codes for EPI program catchment area    | Yes                                | PSTLCODE                  | 1 = Yes<br>2 = No                                                                                                                                                                                                                                                                   |
| Residential Instability                           | ONMARG                        | Neighbourhood-level indicator of residential instability constructed based on census data                                      | Yes                                | INSTABILITY_Q_CSD         | 1 = Least Marginalized<br>5 = Most Marginalized                                                                                                                                                                                                                                     |
| Deprivation                                       | ONMARG                        | Neighbourhood-level indicator of material deprivation constructed based on census data                                         | Yes                                | DEPRIVATION_Q_CSD         | 1 = Least Marginalized<br>5 = Most Marginalized                                                                                                                                                                                                                                     |
| Ethnic Concentration                              | ONMARG                        | Neighbourhood-level indicator of ethnic concentration constructed based on census data                                         | Yes                                | ETHNICCON_Q_CSD           | 1 = Least Marginalized<br>5 = Most Marginalized                                                                                                                                                                                                                                     |
| Dependency                                        | ONMARG                        | Neighbourhood-level indicator of social dependency constructed based on census data                                            | Yes                                | DEPENDENCY_Q_CSD          | 1 = Least Marginalized<br>5 = Most Marginalized                                                                                                                                                                                                                                     |
| Income Quintile                                   | RPDB                          | Neighbourhood-level income quintile                                                                                            | Yes                                | INCQUINT                  | 1 = Lowest Income Quintile<br>5 = Highest Income Quintile                                                                                                                                                                                                                           |
| Migrant Status                                    | IRCC                          | Migrant status for first-generation immigrants and refugees (since 1985)                                                       | Yes                                | CATEG                     | 0 = Non-Migrants (Not Included in IRCC Database)<br>1 = Immigrant (All Codes not Listed Below)<br>2 = Refugee (020-029,031-034,037,047-049,052-055,080,086-089,094-095,120-142,153)                                                                                                 |

**Supplementary Table 1 con't.** – Details of variable creation for all variables used in the analysis.

| Variable Name                               | Source of Data          | Description                                                                                                                         | Included in Propensity Score Model | Variable Name in Database                                                                     | Values and Database Codes                                                                                                                                                                                    |
|---------------------------------------------|-------------------------|-------------------------------------------------------------------------------------------------------------------------------------|------------------------------------|-----------------------------------------------------------------------------------------------|--------------------------------------------------------------------------------------------------------------------------------------------------------------------------------------------------------------|
| <b>Baseline Service-Use Characteristics</b> |                         |                                                                                                                                     |                                    |                                                                                               |                                                                                                                                                                                                              |
| Index Diagnosis                             | DAD, OMHRS, OHIP, NACRS | Diagnostic category of index diagnosis                                                                                              | Yes                                | DXCODE, DX10CODE (DAD)<br>AXIS1_DSM4CODE_DISCH1 (OMHRS)<br>DXCODE (OHIP)<br>DX10CODE1 (NACRS) | 1 = Schizophrenia & Schizoaffective Disorder (ICD-9 = 295.X; ICD-10 = F20, F25)<br>2 = Delusional Disorder (ICD-9 = 297.X; ICD-10 = F22, F24)<br>3 = Other Psychoses (ICD-9 = 298.X; ICD-10 = F23, F28, F29) |
| Year                                        | DAD, OMHRS, OHIP, NACRS | Year of index diagnosis                                                                                                             | Yes                                | DDATE (DAD, OMHRS)<br>SERVDATE (OHIP)<br>REGDATE (NACRS)                                      | N/A                                                                                                                                                                                                          |
| Discordant Diagnosis                        | OHIP, NACRS             | If diagnosis based on physician or emergency department visits, whether the diagnostic category was discordant across the diagnosis | Yes                                | See description of Index Diagnosis                                                            | 1 = Discordant Diagnoses<br>0 = Concordant Diagnoses                                                                                                                                                         |
| Diagnosing Physician                        | DAD, OMHRS, OHIP, NACRS | Specialty of physician making the index diagnosis                                                                                   | No                                 | SPEC (OHIP)<br>PRVSERV1-10 (NACRS)                                                            | 1 = Family Physician (00001)<br>2 = Psychiatrist (00064, 00065; All claims from DAD and OMHRS)<br>3 = Family Physician + Psychiatrist (see above)<br>4 = Other (all other codes)                             |
| Inpatient at Index Diagnosis                | DAD, OMHRS, OHIP, NACRS | Measured as a dichotomous outcome, whether individuals are inpatients at time of index diagnosis                                    | Yes                                | N/A                                                                                           | 1 = Inpatient at Index Diagnosis (source DAD or OMHRS)<br>0 = Outpatient at Index Diagnosis (source OHIP or NACRS)                                                                                           |
| Prior Alcohol Related Disorder              | DAD, OMHRS, OHIP, NACRS | Whether person had contact with services for alcohol-related disorders prior to the index date.                                     | Yes                                | DXCODE, DX10CODE (DAD)<br>AXIS1_DSM4CODE_DISCH1 (OMHRS)<br>DXCODE (OHIP)<br>DX10CODE1 (NACRS) | 1 = Prior contact with services for alcohol-related disorders (ICD-10 = F10; ICD-9 = 291.X, 303.X, 305.0)<br>0 = No prior contact with services for alcohol-related disorders                                |
| Prior Substance Related Disorder            | DAD, OMHRS, OHIP, NACRS | Whether person had contact with services for substance-related disorders prior to the index date.                                   | Yes                                | DXCODE, DX10CODE (DAD)<br>AXIS1_DSM4CODE_DISCH1 (OMHRS)<br>DXCODE (OHIP)<br>DX10CODE1 (NACRS) | 1 = Prior contact with services for substance-related disorders (ICD-10 = F11-F19, F55; ICD-9 = 292.X, 304.X, 305.2-305.9)<br>0 = No prior contact with services for alcohol-related disorders               |

**Supplementary Table 1 con't.** – Details of variable creation for all variables used in the analysis.

| Variable Name                                        | Source of Data | Description                                                                                                                                                                            | Included in Propensity Score Model | Variable Name in Database                               | Values and Database Codes                                                                                                                                                                                        |
|------------------------------------------------------|----------------|----------------------------------------------------------------------------------------------------------------------------------------------------------------------------------------|------------------------------------|---------------------------------------------------------|------------------------------------------------------------------------------------------------------------------------------------------------------------------------------------------------------------------|
| <b>Baseline Service-Use Characteristics Con't.</b>   |                |                                                                                                                                                                                        |                                    |                                                         |                                                                                                                                                                                                                  |
| Family Physician Contact in Previous 6 Months        | OHIP           | Any primary care visit for a mental health reason in the previous 6 months, defined as all mental health service codes and general service codes with a mental health diagnostic code. | Yes                                | Algorithm Description:<br>Med Care:42(10),960-965       | 1 = Contact with Family Physician<br>0 = No Contact with Family Physician                                                                                                                                        |
| Psychiatrist Contact in Previous 6 Months            | OHIP           | Any outpatient psychiatry visit in the previous 6 months                                                                                                                               | Yes                                | SPEC                                                    | 1 = Contact with Psychiatrist (00064, 00065)<br>0 = No Contact with Psychiatrist                                                                                                                                 |
| Emergency Department Visit in Previous 6 Months      | NACRS          | Any emergency department visit for a mental health reason in the previous 6 months                                                                                                     | Yes                                | DX10CODE1                                               | 1 = Emergency Department Visit (ICD-10 = All F codes; ICD-9 = 291.x,292.x,and 295.x-319.x; Transfers excluded)<br>0 = No Emergency Department Visit                                                              |
| Psychiatric Hospitalization in Previous 6 Months     | DAD, OMHRS     | Any hospitalization in the previous 6 months with a primary discharge diagnosis of a mental disorder                                                                                   | Yes                                | DXCODE, DX10CODE (DAD)<br>AXIS1_DSM4CODE_DISCH1 (OMHRS) | 1 = Psychiatric Hospitalization (ICD-10 = All F Codes; ICD-9 = 291.x, 292.x, and 294.x-319.x; OMHRS = All hospitalizations EXCEPT 293.X, 780.X, 290.X, 294.X, and V codes)<br>0 = No Psychiatric Hospitalization |
| Total Psychiatric Hospital Days in Previous 6 Months | DAD, OMHRS     | Total number of psychiatric hospital days in the previous 6 months                                                                                                                     | Yes                                | LOS                                                     | Continuous variable                                                                                                                                                                                              |
| <b>Outcome Variables</b>                             |                |                                                                                                                                                                                        |                                    |                                                         |                                                                                                                                                                                                                  |
| Contact with Primary Care                            | OHIP           | Any primary care visit for a mental health reason after EPI admission, defined as all mental health service codes and general service codes with a mental health diagnostic code.      | No                                 | Algorithm Description:<br>Med Care:42(10),960-965       | 1 = Contact with Family Physician<br>0 = No Contact with Family Physician                                                                                                                                        |
| Contact with Psychiatrist                            | OHIP           | Any outpatient psychiatry visit after EPI admission                                                                                                                                    | No                                 | SPEC                                                    | 1 = Contact with Psychiatrist (00064, 00065)<br>0 = No Contact with Psychiatrist                                                                                                                                 |
| Emergency Department Visits                          | NACRS          | Any emergency department visit for a mental health reason after EPI admission                                                                                                          | No                                 | DX10CODE1                                               | 1 = Emergency Department Visit (ICD-10 = All F codes; ICD-9 = 291.x,292.x,and 295.x-319.x; Transfers excluded)<br>0 = No Emergency Department Visit                                                              |

**Supplementary Table 1 con't.** – Details of variable creation for all variables used in the analysis.

| Variable Name                   | Source of Data   | Description                                                                                                                             | Included in Propensity Score Model | Variable Name in Database                                                                                                         | Values and Database Codes                                                                                                                                                                                                                                                                                                                                                                                        |
|---------------------------------|------------------|-----------------------------------------------------------------------------------------------------------------------------------------|------------------------------------|-----------------------------------------------------------------------------------------------------------------------------------|------------------------------------------------------------------------------------------------------------------------------------------------------------------------------------------------------------------------------------------------------------------------------------------------------------------------------------------------------------------------------------------------------------------|
| <b>Outcome Variables Con't.</b> |                  |                                                                                                                                         |                                    |                                                                                                                                   |                                                                                                                                                                                                                                                                                                                                                                                                                  |
| Psychiatric Hospitalizations    | DAD, OMHRS       | Any hospitalization after EPI admission with a primary discharge diagnosis of a mental disorder                                         | No                                 | DXCODE, DX10CODE (DAD)<br>AXIS1_DSM4CODE_DISCH1 (OMHRS)                                                                           | 1 = Psychiatric Hospitalization (ICD-10 = All F Codes; ICD-9 = 291.x, 292.x, and 294.x-319.x; OMHRS = All hospitalizations EXCEPT 293.X, 780.X, 290.X, 294.X, and V codes)<br>0 = No Psychiatric Hospitalization                                                                                                                                                                                                 |
| Involuntary Admission           | DAD, OMHRS, OHIP | Any involuntary admission after EPI admission, including involuntary status in the emergency department and involuntary hospitalization | No                                 | ADMMETH (DAD)<br>PT_STATUS (OMHRS)<br>FEEDCODE (OHIP)                                                                             | 1 = Involuntary Admission (ADMMETH = D, E; PT_STATUS = 1, 4; FEEDCODE = K623, K624)                                                                                                                                                                                                                                                                                                                              |
| Self-Harm Behaviour             | NACRS            | Any ED visit for self-harm after EPI admission                                                                                          | No                                 | DX10CODE1                                                                                                                         | 1 = Self-Harm Behaviour (ICD9 = E950-E959; ICD 10 = X60-X84)<br>0 = No Self-Harm Behaviour                                                                                                                                                                                                                                                                                                                       |
| Suicide                         | ORGD             | Death by suicide after EPI admission                                                                                                    | No                                 | SUICIDE, DX9CODE, EALIVE, DX10CODE1-25, DISCHDISP (DAD)<br>DISCHREASON (OMHRS)<br>DX10CODE1-10, VISDISP2002 (NACRS)<br>COD (ORGD) | 1 = Suicide <ul style="list-style-type: none"> <li>• DAD: <ul style="list-style-type: none"> <li>i. SUICIDE = 1, or</li> <li>ii. DX9CODE = E950-E959 and EALIVE = X, or</li> <li>iii. DX10CODE1-25 = X60-84 and DISCHDISP = 07</li> </ul> </li> <li>• OMHRS: DISCHREASON (X90) = 2</li> <li>• NACRS: DX10CODE1-10 = X60-84 and VISDISP2002 = 10 or 11</li> <li>• ORGD: COD = E950-E959</li> </ul> 0 = No Suicide |
| All-Cause Mortality             | ORGD             | Death by any cause after EPI admission                                                                                                  | No                                 | DTHDATE                                                                                                                           | 1 = Death after EPI admission<br>0 = Alive                                                                                                                                                                                                                                                                                                                                                                       |

**Supplementary Table 2** – The RECORD checklist of items, extended from the STROBE statement, that should be reported in observational studies using routinely collected health data.

|                           | Item No. | STROBE items                                                                                                                                                                                      | Location in manuscript where items are reported                                               | RECORD items                                                                                                                                                                                                                                                                                                                                                                                                                                | Location in manuscript where items are reported                                                                                                                               |
|---------------------------|----------|---------------------------------------------------------------------------------------------------------------------------------------------------------------------------------------------------|-----------------------------------------------------------------------------------------------|---------------------------------------------------------------------------------------------------------------------------------------------------------------------------------------------------------------------------------------------------------------------------------------------------------------------------------------------------------------------------------------------------------------------------------------------|-------------------------------------------------------------------------------------------------------------------------------------------------------------------------------|
| <b>Title and abstract</b> |          |                                                                                                                                                                                                   |                                                                                               |                                                                                                                                                                                                                                                                                                                                                                                                                                             |                                                                                                                                                                               |
|                           | 1        | (a) Indicate the study's design with a commonly used term in the title or the abstract<br><br>(b) Provide in the abstract an informative and balanced summary of what was done and what was found | Study design reported in abstract (page 2)<br><br>Summary reported in abstract (page 2)       | RECORD 1.1: The type of data used should be specified in the title or abstract. When possible, the name of the databases used should be included.<br><br>RECORD 1.2: If applicable, the geographic region and timeframe within which the study took place should be reported in the title or abstract.<br><br>RECORD 1.3: If linkage between databases was conducted for the study, this should be clearly stated in the title or abstract. | Noted in both the title (page 1) and abstract (page 2)<br><br>Geographic region and timeframe reported in abstract (page 2)<br><br>Data linkage reported in abstract (page 2) |
| <b>Introduction</b>       |          |                                                                                                                                                                                                   |                                                                                               |                                                                                                                                                                                                                                                                                                                                                                                                                                             |                                                                                                                                                                               |
| Background rationale      | 2        | Explain the scientific background and rationale for the investigation being reported                                                                                                              | Background and rationale reported on pages 3 and 4                                            |                                                                                                                                                                                                                                                                                                                                                                                                                                             |                                                                                                                                                                               |
| Objectives                | 3        | State specific objectives, including any prespecified hypotheses                                                                                                                                  | Objectives and hypotheses reported on page 4 (2 <sup>nd</sup> paragraph)                      |                                                                                                                                                                                                                                                                                                                                                                                                                                             |                                                                                                                                                                               |
| <b>Methods</b>            |          |                                                                                                                                                                                                   |                                                                                               |                                                                                                                                                                                                                                                                                                                                                                                                                                             |                                                                                                                                                                               |
| Study Design              | 4        | Present key elements of study design early in the paper                                                                                                                                           | Summary of key methods presented in last paragraph of background (page 4)                     |                                                                                                                                                                                                                                                                                                                                                                                                                                             |                                                                                                                                                                               |
| Setting                   | 5        | Describe the setting, locations, and relevant dates, including periods of recruitment, exposure, follow-up, and data collection                                                                   | Study setting described on pages 4 and 5, other details of cohort creation reported on page 6 |                                                                                                                                                                                                                                                                                                                                                                                                                                             |                                                                                                                                                                               |

**Supplementary Table 2 con't.** – The RECORD checklist of items, extended from the STROBE statement, that should be reported in observational studies using routinely collected health data.

|                           | Item No. | STROBE items                                                                                                                                                                                                                                                             | Location in manuscript where items are reported                                                                     | RECORD items                                                                                                                                                                                                                                                                                                                                                                                                                                                                                                                                                                                                                                                                                         | Location in manuscript where items are reported                                                                                              |
|---------------------------|----------|--------------------------------------------------------------------------------------------------------------------------------------------------------------------------------------------------------------------------------------------------------------------------|---------------------------------------------------------------------------------------------------------------------|------------------------------------------------------------------------------------------------------------------------------------------------------------------------------------------------------------------------------------------------------------------------------------------------------------------------------------------------------------------------------------------------------------------------------------------------------------------------------------------------------------------------------------------------------------------------------------------------------------------------------------------------------------------------------------------------------|----------------------------------------------------------------------------------------------------------------------------------------------|
| <b>Methods</b>            |          |                                                                                                                                                                                                                                                                          |                                                                                                                     |                                                                                                                                                                                                                                                                                                                                                                                                                                                                                                                                                                                                                                                                                                      |                                                                                                                                              |
| Participants              | 6        | <p>(a) <i>Cohort study</i> - Give the eligibility criteria, and the sources and methods of selection of participants. Describe methods of follow-up</p> <p>(b) <i>Cohort study</i> - For matched studies, give matching criteria and number of exposed and unexposed</p> | <p>Described in first paragraph of page 6</p> <p>Propensity score matching procedure described on pages 8 and 9</p> | <p>RECORD 6.1: The methods of study population selection (such as codes or algorithms used to identify subjects) should be listed in detail. If this is not possible, an explanation should be provided.</p> <p>RECORD 6.2: Any validation studies of the codes or algorithms used to select the population should be referenced. If validation was conducted for this study and not published elsewhere, detailed methods and results should be provided.</p> <p>RECORD 6.3: If the study involved linkage of databases, consider use of a flow diagram or other graphical display to demonstrate the data linkage process, including the number of individuals with linked data at each stage.</p> | <p>Cohort creation described on page 6</p> <p>Validation study cited on page 6</p> <p>Flow diagram of data linkage presented in figure 1</p> |
| Variables                 | 7        | Clearly define all outcomes, exposures, predictors, potential confounders, and effect modifiers. Give diagnostic criteria, if applicable.                                                                                                                                | Described on pages 6 through 8, and in Supplemental Table 2                                                         | RECORD 7.1: A complete list of codes and algorithms used to classify exposures, outcomes, confounders, and effect modifiers should be provided. If these cannot be reported, an explanation should be provided.                                                                                                                                                                                                                                                                                                                                                                                                                                                                                      | Data dictionary available in Supplemental Table 2                                                                                            |
| Data sources/ measurement | 8        | For each variable of interest, give sources of data and details of methods of assessment (measurement). Describe comparability of assessment methods if there is more than one group                                                                                     | Details of variable creation described on pages 7 and 8, and in Supplemental Table 2                                |                                                                                                                                                                                                                                                                                                                                                                                                                                                                                                                                                                                                                                                                                                      |                                                                                                                                              |

**Supplementary Table 2 con't.** – The RECORD checklist of items, extended from the STROBE statement, that should be reported in observational studies using routinely collected health data.

|                                  | Item No. | STROBE items                                                                                                                                                                                                                                                                                                                                 | Location in manuscript where items are reported                                              | RECORD items                                                                                                                                                                                                                               | Location in manuscript where items are reported           |
|----------------------------------|----------|----------------------------------------------------------------------------------------------------------------------------------------------------------------------------------------------------------------------------------------------------------------------------------------------------------------------------------------------|----------------------------------------------------------------------------------------------|--------------------------------------------------------------------------------------------------------------------------------------------------------------------------------------------------------------------------------------------|-----------------------------------------------------------|
| <b>Methods con't.</b>            |          |                                                                                                                                                                                                                                                                                                                                              |                                                                                              |                                                                                                                                                                                                                                            |                                                           |
| Bias                             | 9        | Describe any efforts to address potential sources of bias                                                                                                                                                                                                                                                                                    | Characteristics of unmatched users described on pages 10 and 17, and in Supplemental Table 3 |                                                                                                                                                                                                                                            |                                                           |
| Study size                       | 10       | Explain how the study size was arrived at                                                                                                                                                                                                                                                                                                    | N/A – included all cases over 17-year period                                                 |                                                                                                                                                                                                                                            |                                                           |
| Quantitative variables           | 11       | Explain how quantitative variables were handled in the analyses. If applicable, describe which groupings were chosen, and why                                                                                                                                                                                                                | Described on page 9                                                                          |                                                                                                                                                                                                                                            |                                                           |
| Statistical methods              | 12       | (a) Describe all statistical methods, including those used to control for confounding<br>(b) Describe any methods used to examine subgroups and interactions<br>(c) Explain how missing data were addressed<br>(d) <i>Cohort study</i> - If applicable, explain how loss to follow-up was addressed<br>(e) Describe any sensitivity analyses | Described on pages 8 (propensity score methods) and 9 (details of statistical analyses)      |                                                                                                                                                                                                                                            |                                                           |
| Data access and cleaning methods |          |                                                                                                                                                                                                                                                                                                                                              |                                                                                              | RECORD 12.1: Authors should describe the extent to which the investigators had access to the database population used to create the study population.<br><br>RECORD 12.2: Authors should provide information on the data cleaning methods. | Described in acknowledgement section (page 18)<br><br>N/A |

**Supplementary Table 2 con't.** – The RECORD checklist of items, extended from the STROBE statement, that should be reported in observational studies using routinely collected health data.

|                       | Item No. | STROBE items                                                                                                                                                                                                                                                                                                                                            | Location in manuscript where items are reported                                                                                    | RECORD items                                                                                                                                                                                                                                                                                                       | Location in manuscript where items are reported                                                     |
|-----------------------|----------|---------------------------------------------------------------------------------------------------------------------------------------------------------------------------------------------------------------------------------------------------------------------------------------------------------------------------------------------------------|------------------------------------------------------------------------------------------------------------------------------------|--------------------------------------------------------------------------------------------------------------------------------------------------------------------------------------------------------------------------------------------------------------------------------------------------------------------|-----------------------------------------------------------------------------------------------------|
| <b>Methods con't.</b> |          |                                                                                                                                                                                                                                                                                                                                                         |                                                                                                                                    |                                                                                                                                                                                                                                                                                                                    |                                                                                                     |
| Linkage               |          | ..                                                                                                                                                                                                                                                                                                                                                      |                                                                                                                                    | RECORD 12.3: State whether the study included person-level, institutional-level, or other data linkage across two or more databases. The methods of linkage and methods of linkage quality evaluation should be provided.                                                                                          | Details of data linkages provided on page 5 (source of data) and page 6 (2 <sup>nd</sup> paragraph) |
| <b>Results</b>        |          |                                                                                                                                                                                                                                                                                                                                                         |                                                                                                                                    |                                                                                                                                                                                                                                                                                                                    |                                                                                                     |
| Participants          | 13       | (a) Report the numbers of individuals at each stage of the study ( <i>e.g.</i> , numbers potentially eligible, examined for eligibility, confirmed eligible, included in the study, completing follow-up, and analysed)<br>(b) Give reasons for non-participation at each stage.<br>(c) Consider use of a flow diagram                                  | Flow chart with reasons for exclusion presented in Figure 1                                                                        | RECORD 13.1: Describe in detail the selection of the persons included in the study ( <i>i.e.</i> , study population selection) including filtering based on data quality, data availability and linkage. The selection of included persons can be described in the text and/or by means of the study flow diagram. | Flow chart with reasons for exclusion presented in Figure 1                                         |
| Descriptive data      | 14       | (a) Give characteristics of study participants ( <i>e.g.</i> , demographic, clinical, social) and information on exposures and potential confounders<br><br>(b) Indicate the number of participants with missing data for each variable of interest<br><br>(c) <i>Cohort study</i> - summarise follow-up time ( <i>e.g.</i> , average and total amount) | Characteristics presented in Table 1<br><br>N/A – participants with missing data (<1%) excluded<br><br>Presented in Tables 2 and 3 |                                                                                                                                                                                                                                                                                                                    |                                                                                                     |



**Supplementary Table 2 con't.** – The RECORD checklist of items, extended from the STROBE statement, that should be reported in observational studies using routinely collected health data.

|                       | Item No. | STROBE items                                                                                                                                                                                                                                                                                                                                                                                                                   | Location in manuscript where items are reported                                                                                                                                      | RECORD items | Location in manuscript where items are reported |
|-----------------------|----------|--------------------------------------------------------------------------------------------------------------------------------------------------------------------------------------------------------------------------------------------------------------------------------------------------------------------------------------------------------------------------------------------------------------------------------|--------------------------------------------------------------------------------------------------------------------------------------------------------------------------------------|--------------|-------------------------------------------------|
| <b>Results con't.</b> |          |                                                                                                                                                                                                                                                                                                                                                                                                                                |                                                                                                                                                                                      |              |                                                 |
| Outcome data          | 15       | <i>Cohort study</i> - Report numbers of outcome events or summary measures over time                                                                                                                                                                                                                                                                                                                                           | Presented in Tables 2 and 3                                                                                                                                                          |              |                                                 |
| Main results          | 16       | <p>(a) Give unadjusted estimates and, if applicable, confounder-adjusted estimates and their precision (e.g., 95% confidence interval). Make clear which confounders were adjusted for and why they were included</p> <p>(b) Report category boundaries when continuous variables were categorized</p> <p>(c) If relevant, consider translating estimates of relative risk into absolute risk for a meaningful time period</p> | <p>Propensity score matching used to account for confounding. Estimates presented in Tables 2 and 3</p> <p>N/A</p> <p>Absolute risk presented for all-cause mortality (page 11).</p> |              |                                                 |
| Other analyses        | 17       | Report other analyses done— e.g., analyses of subgroups and interactions, and sensitivity analyses                                                                                                                                                                                                                                                                                                                             | N/A                                                                                                                                                                                  |              |                                                 |

**Supplementary Table 2 con't.** – The RECORD checklist of items, extended from the STROBE statement, that should be reported in observational studies using routinely collected health data.

|                                                           | Item No. | STROBE items                                                                                                                                                               | Location in manuscript where items are reported | RECORD items                                                                                                                                                                                                                                                                                             | Location in manuscript where items are reported |
|-----------------------------------------------------------|----------|----------------------------------------------------------------------------------------------------------------------------------------------------------------------------|-------------------------------------------------|----------------------------------------------------------------------------------------------------------------------------------------------------------------------------------------------------------------------------------------------------------------------------------------------------------|-------------------------------------------------|
| <b>Discussion</b>                                         |          |                                                                                                                                                                            |                                                 |                                                                                                                                                                                                                                                                                                          |                                                 |
| Key results                                               | 18       | Summarise key results with reference to study objectives                                                                                                                   | Summarized on page 12                           |                                                                                                                                                                                                                                                                                                          |                                                 |
| Limitations                                               | 19       | Discuss limitations of the study, taking into account sources of potential bias or imprecision. Discuss both direction and magnitude of any potential bias                 | Described on pages 15 to 18                     | RECORD 19.1: Discuss the implications of using data that were not created or collected to answer the specific research question(s). Include discussion of misclassification bias, unmeasured confounding, missing data, and changing eligibility over time, as they pertain to the study being reported. | Described on pages 15 to 18                     |
| Interpretation                                            | 20       | Give a cautious overall interpretation of results considering objectives, limitations, multiplicity of analyses, results from similar studies, and other relevant evidence | Overall conclusions presented on page 17        |                                                                                                                                                                                                                                                                                                          |                                                 |
| Generalisability                                          | 21       | Discuss the generalisability (external validity) of the study results                                                                                                      | Described in the last paragraph of page 16      |                                                                                                                                                                                                                                                                                                          |                                                 |
| <b>Other Information</b>                                  |          |                                                                                                                                                                            |                                                 |                                                                                                                                                                                                                                                                                                          |                                                 |
| Funding                                                   | 22       | Give the source of funding and the role of the funders for the present study and, if applicable, for the original study on which the present article is based              | Source of funding described in acknowledgements |                                                                                                                                                                                                                                                                                                          |                                                 |
| Accessibility of protocol, raw data, and programming code |          | ..                                                                                                                                                                         |                                                 | RECORD 22.1: Authors should provide information on how to access any supplemental information such as the study protocol, raw data, or programming code.                                                                                                                                                 | Addressed in acknowledgement section            |

\*Reference: Benchimol EI, Smeeth L, Guttman A, Harron K, Moher D, Petersen I, Sørensen HT, von Elm E, Langan SM, the RECORD Working Committee. The REporting of studies Conducted using Observational Routinely-collected health Data (RECORD) Statement. *PLoS Medicine* 2015; in press.

Supplementary Table 3 – Baseline characteristics and outcome measures for matched vs. unmatched EPI-users.

| Value                                                      | Matched EPI-Users<br>n = 530<br>n (%)* | Unmatched EPI-Users<br>n = 224<br>n (%)* | Standardized<br>Difference* |
|------------------------------------------------------------|----------------------------------------|------------------------------------------|-----------------------------|
| <b>Baseline Socio-Demographic Characteristics</b>          |                                        |                                          |                             |
| Age (years), mean ± SD                                     | 25.77 ± 7.85                           | 20.54 ± 4.16                             | 83%                         |
| Male Gender                                                | 365 (68.9%)                            | 193 (86.2%)                              | 42%                         |
| Rural Residence                                            | 40 (7.5%)                              | 14 (6.3%)                                | 6%                          |
| Resides Outside of Catchment                               | 83 (15.7%)                             | 9 (4.0%)                                 | 40%                         |
| Lowest Income Quintile                                     | 139 (26.2%)                            | 41 (18.3%)                               | 19%                         |
|                                                            | 2 132 (24.9%)                          | 43 (19.2%)                               | 14%                         |
|                                                            | 3 100 (18.9%)                          | 47 (21.0%)                               | 5%                          |
|                                                            | 4 67 (12.6%)                           | 44 (19.6%)                               | 19%                         |
| Highest Income Quintile                                    | 5 90 (17.0%)                           | 48 (21.4%)                               | 11%                         |
| Non-Migrant                                                | 469 (88.5%)                            | 202 (90.2%)                              | 5%                          |
| Immigrant                                                  | 33 (6.2%)                              | 14 (6.3%)                                | 0%                          |
| Refugee                                                    | 28 (5.3%)                              | 8 (3.6%)                                 | 8%                          |
| <b>Baseline Clinical &amp; Service-Use Characteristics</b> |                                        |                                          |                             |
| <b>Index Diagnosis</b>                                     |                                        |                                          |                             |
| Schizophrenia                                              | 217 (40.9%)                            | 75 (33.5%)                               | 15%                         |
| Delusional Disorder                                        | 39 (7.4%)                              | 18 (8.0%)                                | 3%                          |
| Other Psychoses                                            | 274 (51.7%)                            | 131 (58.5%)                              | 14%                         |
| <b>Diagnosing Physician</b>                                |                                        |                                          |                             |
| GP                                                         | 22 (4.2%)                              | 9 (4.0%)                                 | 1%                          |
| Psychiatrist                                               | 432 (81.5%)                            | 177 (79.0%)                              | 6%                          |
| GP + Psychiatrist                                          | 44 (8.3%)                              | 17 (7.6%)                                | 3%                          |
| Other                                                      | 32 (6.0%)                              | 21 (9.4%)                                | 13%                         |
| Inpatient at Index Diagnosis                               | 126 (23.8%)                            | 52 (23.2%)                               | 1%                          |
| Prior Alcohol-Related Disorder                             | 45 (8.5%)                              | 6 (2.7%)                                 | 26%                         |
| Prior Substance-Related Disorder                           | 91 (17.2%)                             | 21 (9.4%)                                | 23%                         |
| Prior Family Physician Contact                             | 185 (34.9%)                            | 66 (29.5%)                               | 12%                         |
| Prior Psychiatrist Contact                                 | 115 (21.7%)                            | 55 (24.6%)                               | 7%                          |
| Prior Mental Health ED Visit                               | 74 (14.0%)                             | 17 (7.6%)                                | 21%                         |
| Prior Psychiatric Hospitalization                          | 29 (5.5%)                              | 10 (4.5%)                                | 5%                          |
| <b>Outcome Measures</b>                                    |                                        |                                          |                             |
| Contact with Primary Care                                  | 226 (42.6%)                            | 109 (39.4%)                              | 7%                          |
| Contact with Psychiatrist                                  | 523 (98.7%)                            | 259 (93.5%)                              | 27%                         |
| Emergency Department Visit                                 | 153 (28.9%)                            | 78 (28.2%)                               | 2%                          |
| Hospitalization                                            | 157 (29.6%)                            | 85 (30.7%)                               | 2%                          |
| Involuntary Admission                                      | 181 (34.2%)                            | 104 (37.5%)                              | 7%                          |
| Self-Harm                                                  | <=5                                    | <=5                                      | 6%                          |
| Death by Suicide                                           | <=5                                    | <=5                                      | 11%                         |
| All-Cause Mortality                                        | <=5                                    | <=5                                      | 3%                          |

\* Standardized difference >10% indicates significant between-group differences
